# Supplementary material
Source: PubMed Central journal article supplement (PMC8383152)
Supplement: NIHMS1729104-supplement-Supp_Mat.pdf [file NIHMS1729104-supplement-Supp_Mat.pdf]

## SUPPLEMENTARY INFORMATION

1

2

3 **Table S1.** Published progression-free survival (PFS) analyses, selected PFS cohorts, available risk tables, and published doubling  
 4 times for each cancer type. The published PFS were used for data fitting and simulations, and the simulated output was compared to  
 5 the published doubling times.

| Cancer     | Cohort      | Published PFS data |           | Published DBT                         |           |
|------------|-------------|--------------------|-----------|---------------------------------------|-----------|
|            |             | Risk Table (Y/N)   | Reference | DBT (months) <sup>1</sup>             | Reference |
| Pancreatic | Gemcitabine | Y                  | (1)       | 5.30 (3.84, 6.76) [42]                | (2)       |
|            |             |                    |           | 4.80 (2.1 – 8.5) <sup>3</sup>         | (4)       |
|            |             |                    |           | 2.67 (1.3 – 13.33) <sup>3</sup>       | (5)       |
|            |             |                    |           | 1.64 (1.31, 1.96) [112]               | (6)       |
| Melanoma   | BRAF-mutant | Y                  | (3)       | 6.84 (4.37, 9.31) [76]                | (7)       |
|            |             |                    |           | 1.43 (0.99, 1.86) [87]                | (8)       |
|            |             |                    |           | 4.80 (2.1 – 8.5) <sup>3</sup>         | (4)       |
|            |             |                    |           | 5.26(3.78, 6.74) [103]                | (10)      |
| HCC        | Placebo     | Y                  | (9)       | 2.37 (1 – 4.9) <sup>4</sup>           | (12)      |
| RCC        | Placebo     | Y                  | (11)      | 15.6 (13.34, 17.86) [18] <sup>5</sup> | (14)      |
| TN Breast  | Tivantinib  | Y                  | (13)      |                                       |           |

|               |                    |   |      |                                     |      |
|---------------|--------------------|---|------|-------------------------------------|------|
|               |                    |   |      | 1.53 (0.85, 2.21) [96]              | (16) |
|               |                    |   |      | Women: 22.93 (7.18, 38.69)<br>[192] | (17) |
| NSCLC         | Placebo            | Y | (15) | Men: 7.80 (0.92, 14.68)<br>[191]    | (17) |
|               |                    |   |      | 15.07 (11.88, 18.25) [84]           | (18) |
|               |                    |   |      | 36.90 (0.13, 11.73) [36]            | (19) |
|               |                    |   |      | 2.07 (1.60, 2.93) [67]              | (20) |
| HR+ Breast    | Exemestane+Placebo | Y | (21) | 8.03 (6.25, 9.82) [69]              | (22) |
| HER-2+ Breast | Anastrozole        | Y | (23) | 5.40 (4.27, 6.53) [37]              | (22) |
| Gastric       | UFTM               | N | (24) | 10.08 (6.48, 13.67) [63]            | (25) |
| GBM           | Procarbazine       | N | (26) | 1.65 <sup>7</sup>                   | (27) |
| CRC           | BSC                | Y | (28) | 3.17 (0.05 – 10.63) <sup>8</sup>    | (29) |
| Prostate      | Mitoxantrone       | Y | (30) | 13.91 (4.75, 23.08) [82]            | (31) |

6

7 Note: references for all PFS curves included in the literature search can be found in (1,3,9,11,13,21,23,24,26,28,30,32-67).

8

9 Abbreviations: BSC = best supportive care; UFTM = uracil + fluorouracil + tegafur + mitomycin. CRC = colorectal cancer; GBM =  
10 glioblastoma multiforme; HER-2<sup>+</sup> = human epidermal growth factor receptor-2 positive, HR<sup>+</sup> = hormone receptor positive, TN = triple  
11 negative; NSCLC = non-small cell lung cancer; RCC = renal cell carcinoma; HCC = hepatocellular carcinoma

## 12 **References for Supplementary Table 1**

- 13 1. Conroy T, Desseigne F, Ychou M, Bouche O, Guimbaud R, Becouarn Y, *et al.*  
14 FOLFIRINOX versus gemcitabine for metastatic pancreatic cancer. *N Engl J Med*  
15 **2011**;364:1817-25
- 16 2. Furukawa H, Iwata R, Moriyama N. Growth rate of pancreatic adenocarcinoma:  
17 initial clinical experience. *Pancreas* **2001**;22:366-9
- 18 3. Kim KB, Kefford R, Pavlick AC, Infante JR, Ribas A, Sosman JA, *et al.* Phase II  
19 study of the MEK1/MEK2 inhibitor Trametinib in patients with metastatic BRAF-  
20 mutant cutaneous melanoma previously treated with or without a BRAF inhibitor.  
21 *J Clin Oncol* **2013**;31:482-9
- 22 4. Carlson JA. Tumor doubling time of cutaneous melanoma and its metastasis. *Am*  
23 *J Dermatopathol* **2003**;25:291-9
- 24 5. LorraineTafra, S.Dale P, A.Wanek L, P.Ramming K, L.Morton D. Resection and  
25 adjuvant immunotherapy for melanoma metastatic to the lung and thorax. *J*  
26 *Thorac Cardiovasc Surg* **1995**;110:119-29
- 27 6. Plesnicar S, Klanjscek G, Modic S. Actual doubling time values of pulmonary  
28 metastases from malignant melanoma. *Aust N Z J Surg* **1978**;48:23-35
- 29 7. Augsburger JJ, Gonder JR, Amsel J, Shields JA. Growth rates and doubling times  
30 of posterior uveal melanomas. *Ophthalmology* **1984**;91:1709-15
- 31 8. Knutson CO, Hori JM, Spratt J, J S. Melanoma. *Curr Probl Surg* **1971**;8:2-55
- 32 9. Cheng AL, Kang YK, Chen Z, Tsao CJ, Qin S, Kim JS, *et al.* Efficacy and safety  
33 of sorafenib in patients in the Asia-Pacific region with advanced hepatocellular  
34 carcinoma: a phase III randomised, double-blind, placebo-controlled trial. *Lancet*  
35 *Oncol* **2009**;10:25-34
- 36 10. Jha RC, Zanello PA, Nguyen XM, Pehlivanova M, Johnson LB, Fishbein T, *et al.*  
37 Small hepatocellular carcinoma: MRI findings for predicting tumor growth rates.  
38 *Acad Radiol* **2014**;21:1455-64
- 39 11. Motzer RJ, Escudier B, Oudard S, Hutson TE, Porta C, Bracarda S, *et al.* Efficacy  
40 of everolimus in advanced renal cell carcinoma: a double-blind, randomised,  
41 placebo-controlled phase III trial. *Lancet* **2008**;372:449-56

- 42 12. Kim JK, Kim HD, Jun MJ, Yun SC, Shim JH, Lee HC, *et al.* Tumor Volume  
43 Doubling Time as a Dynamic Prognostic Marker for Patients with Hepatocellular  
44 Carcinoma. *Dig Dis Sci* **2017**;62:2923-31
- 45 13. Tolaney SM, Tan S, Guo H, Barry W, Van Allen E, Wagle N, *et al.* Phase II study  
46 of tivantinib (ARQ 197) in patients with metastatic triple-negative breast cancer.  
47 *Invest New Drugs* **2015**;33:1108-14
- 48 14. Fujimoto N, Sugita A, Terasawa Y, Kato M. Observations on the growth rate of  
49 renal cell carcinoma. *Int J Urol* **1995**;2:71-6
- 50 15. Arai T, Kuroishi T, Saito Y, Kurita Y, Naruke T, Kaneko M. Tumor doubling  
51 time and prognosis in lung cancer patients: evaluation from chest films and  
52 clinical follow-up study. Japanese Lung Cancer Screening Research Group. *Jpn J*  
53 *Clin Oncol* **1994**;24:199-204
- 54 16. El Sharouni SY, Kal HB, Battermann JJ. Accelerated regrowth of non-small-cell  
55 lung tumours after induction chemotherapy. *Br J Cancer* **2003**;89:2184-9
- 56 17. Rebecca M. Lindell, Hartman TE, Swensen SJ, Jett JR, Midthun DE, Tazelaar  
57 HD, *et al.* Five-year Lung Cancer Screening Experience: CT Appearance, Growth  
58 Rate, Location, and Histologic Features of 61 Lung Cancers. *Radiology*  
59 **2007**;242:555-62
- 60 18. M Hasegawa SS, S Takashima, F Li, Z G Yang, Y Maruyama, and T Watanabe.  
61 Growth rate of small lung cancers detected on mass CT screening. *Br J Radiol*  
62 **2000**;73:1252-9
- 63 19. Blomqvist C, Wiklund T, Tarkkanen M, Elomaa I, Virolainen M. Measurement of  
64 growth rate of lung metastases in 21 patients with bone or soft-tissuesarcoma. *Br J*  
65 *Cancer* **1993**;68:414-7
- 66 20. Everitt S, Herschtal A, Callahan J, Plumridge N, Ball D, Kron T, *et al.* High rates  
67 of tumor growth and disease progression detected on serial pretreatment  
68 fluorodeoxyglucose-positron emission tomography/computed tomography scans  
69 in radical radiotherapy candidates with nonsmall cell lung cancer. *Cancer*  
70 **2010**;116:5030-7

- 71 21. Baselga J, Campone M, Piccart M, Burris HA, 3rd, Rugo HS, Sahmoud T, *et al.*  
72 Everolimus in postmenopausal hormone-receptor-positive advanced breast  
73 cancer. *N Engl J Med* **2012**;366:520-9
- 74 22. Ryu EB, Chang JM, Seo M, Kim SA, Lim JH, Moon WK. Tumour volume  
75 doubling time of molecular breast cancer subtypes assessed by serial breast  
76 ultrasound. *Eur Radiol* **2014**;24:2227-35
- 77 23. Kaufman B, Mackey JR, Clemens MR, Bapsy PP, Vaid A, Wardley A, *et al.*  
78 Trastuzumab plus anastrozole versus anastrozole alone for the treatment of  
79 postmenopausal women with human epidermal growth factor receptor 2-positive,  
80 hormone receptor-positive metastatic breast cancer: results from the randomized  
81 phase III TAnDEM study. *J Clin Oncol* **2009**;27:5529-37
- 82 24. Ohtsu A, Shimada Y, Shirao K, Boku N, Hyodo I, Saito H, *et al.* Randomized  
83 phase III trial of fluorouracil alone versus fluorouracil plus cisplatin versus uracil  
84 and tegafur plus mitomycin in patients with unresectable, advanced gastric  
85 cancer: The Japan Clinical Oncology Group Study (JCOG9205). *J Clin Oncol*  
86 **2003**;21:54-9
- 87 25. Haruma K, Suzuki T, Tsuda T, Yoshihara M, Sumii K, Kajiyama G. Evaluation  
88 of tumor growth rate in patients with early gastric carcinoma of the elevated type.  
89 *Gastrointest Radiol* **1991**;16:289-92
- 90 26. Yung WK, Albright RE, Olson J, Fredericks R, Fink K, Prados MD, *et al.* A  
91 phase II study of temozolomide vs. procarbazine in patients with glioblastoma  
92 multiforme at first relapse. *Br J Cancer* **2000**;83:588-93
- 93 27. Stensjoen AL, Solheim O, Kvistad KA, Haberg AK, Salvesen O, Berntsen EM.  
94 Growth dynamics of untreated glioblastomas in vivo. *Neuro Oncol* **2015**;17:1402-  
95 11
- 96 28. Amado RG, Wolf M, Peeters M, Van Cutsem E, Siena S, Freeman DJ, *et al.*  
97 Wild-type KRAS is required for panitumumab efficacy in patients with metastatic  
98 colorectal cancer. *J Clin Oncol* **2008**;26:1626-34
- 99 29. James BM, Gillard JH, Antoun NM, Scott IS, Coleman N, Pinto EM, *et al.*  
100 Glioblastoma Doubling Time and Cellular Proliferation Markers. *Clinical*  
101 *Oncology* **2007**;19

- 102 30. de Bono JS, Oudard S, Ozguroglu M, Hansen S, Machiels JP, Kocak I, *et al.*  
103 Prednisone plus cabazitaxel or mitoxantrone for metastatic castration-resistant  
104 prostate cancer progressing after docetaxel treatment: a randomised open-label  
105 trial. *Lancet* **2010**;376:1147-54
- 106 31. Tada M, Misaki F, Kawai K. Growth rates of colorectal carcinoma and adenoma  
107 by roentgenologic follow-up observations. *Gastroenterol Jpn* **1984**;19:550-5
- 108 32. Stintzing S, Modest DP, Rossius L, Lerch MM, von Weikersthal LF, Decker T, *et al.*  
109 FOLFIRI plus cetuximab versus FOLFIRI plus bevacizumab for metastatic  
110 colorectal cancer (FIRE-3): a post-hoc analysis of tumour dynamics in the final  
111 RAS wild-type subgroup of this randomised open-label phase 3 trial. *Lancet*  
112 *Oncol* **2016**;17:1426-34
- 113 33. Porschen R, Arkenau HT, Kubicka S, Greil R, Seufferlein T, Freier W, *et al.*  
114 Phase III study of capecitabine plus oxaliplatin compared with fluorouracil and  
115 leucovorin plus oxaliplatin in metastatic colorectal cancer: a final report of the  
116 AIO Colorectal Study Group. *J Clin Oncol* **2007**;25:4217-23
- 117 34. Hecht JR, Mitchell E, Chidiac T, Scroggin C, Hagenstad C, Spigel D, *et al.* A  
118 randomized phase IIIB trial of chemotherapy, bevacizumab, and panitumumab  
119 compared with chemotherapy and bevacizumab alone for metastatic colorectal  
120 cancer. *J Clin Oncol* **2009**;27:672-80
- 121 35. Vanhoefler U, Rougier P, Wilke H, Ducreux MP, Lacave AJ, Van Cutsem E, *et al.*  
122 Final results of a randomized phase III trial of sequential high-dose methotrexate,  
123 fluorouracil, and doxorubicin versus etoposide, leucovorin, and fluorouracil  
124 versus infusional fluorouracil and cisplatin in advanced gastric cancer: A trial of  
125 the European Organization for Research and Treatment of Cancer Gastrointestinal  
126 Tract Cancer Cooperative Group. *J Clin Oncol* **2000**;18:2648-57
- 127 36. Ohtsu A, Shah MA, Van Cutsem E, Rha SY, Sawaki A, Park SR, *et al.*  
128 Bevacizumab in combination with chemotherapy as first-line therapy in advanced  
129 gastric cancer: a randomized, double-blind, placebo-controlled phase III study. *J*  
130 *Clin Oncol* **2011**;29:3968-76

- 131 37. Boku N, Yamamoto S, Fukuda H, Shirao K, Doi T, Sawaki A, *et al.* Fluorouracil  
132 versus combination of irinotecan plus cisplatin versus S-1 in metastatic gastric  
133 cancer: a randomised phase 3 study. *Lancet Oncol* **2009**;10:1063-9
- 134 38. Brada M, Stenning S, Gabe R, Thompson LC, Levy D, Rampling R, *et al.*  
135 Temozolomide versus procarbazine, lomustine, and vincristine in recurrent high-  
136 grade glioma. *J Clin Oncol* **2010**;28:4601-8
- 137 39. Vredenburgh JJ, Desjardins A, Herndon JE, 2nd, Dowell JM, Reardon DA, Quinn  
138 JA, *et al.* Phase II trial of bevacizumab and irinotecan in recurrent malignant  
139 glioma. *Clin Cancer Res* **2007**;13:1253-9
- 140 40. Chang SM, Wen P, Cloughesy T, Greenberg H, Schiff D, Conrad C, *et al.* Phase  
141 II study of CCI-779 in patients with recurrent glioblastoma multiforme. *Invest*  
142 *New Drugs* **2005**;23:357-61
- 143 41. Abou-Alfa GK, Johnson P, Knox JJ, Capanu M, Davidenko I, Lacava J, *et al.*  
144 Doxorubicin plus sorafenib vs doxorubicin alone in patients with advanced  
145 hepatocellular carcinoma: a randomized trial. *JAMA* **2010**;304:2154-60
- 146 42. Cheng AL, Kang YK, Lin DY, Park JW, Kudo M, Qin S, *et al.* Sunitinib versus  
147 sorafenib in advanced hepatocellular cancer: results of a randomized phase III  
148 trial. *J Clin Oncol* **2013**;31:4067-75
- 149 43. Johnson PJ, Qin S, Park JW, Poon RT, Raoul JL, Philip PA, *et al.* Brivanib versus  
150 sorafenib as first-line therapy in patients with unresectable, advanced  
151 hepatocellular carcinoma: results from the randomized phase III BRISK-FL study.  
152 *J Clin Oncol* **2013**;31:3517-24
- 153 44. Awada A, Colomer R, Inoue K, Bondarenko I, Badwe RA, Demetriou G, *et al.*  
154 Neratinib Plus Paclitaxel vs Trastuzumab Plus Paclitaxel in Previously Untreated  
155 Metastatic ERBB2-Positive Breast Cancer: The NEfERT-T Randomized Clinical  
156 Trial. *JAMA Oncol* **2016**;2:1557-64
- 157 45. Gelmon KA, Boyle FM, Kaufman B, Huntsman DG, Manikhas A, Di Leo A, *et*  
158 *al.* Lapatinib or Trastuzumab Plus Taxane Therapy for Human Epidermal Growth  
159 Factor Receptor 2-Positive Advanced Breast Cancer: Final Results of NCIC CTG  
160 MA.31. *J Clin Oncol* **2015**;33:1574-83

- 161 46. Harbeck N, Huang CS, Hurvitz S, Yeh DC, Shao Z, Im SA, *et al.* Afatinib plus  
162 vinorelbine versus trastuzumab plus vinorelbine in patients with HER2-  
163 overexpressing metastatic breast cancer who had progressed on one previous  
164 trastuzumab treatment (LUX-Breast 1): an open-label, randomised, phase 3 trial.  
165 *Lancet Oncol* **2016**;17:357-66
- 166 47. Johnston S, Pippen J, Jr., Pivot X, Lichinitser M, Sadeghi S, Dieras V, *et al.*  
167 Lapatinib combined with letrozole versus letrozole and placebo as first-line  
168 therapy for postmenopausal hormone receptor-positive metastatic breast cancer. *J*  
169 *Clin Oncol* **2009**;27:5538-46
- 170 48. Bonneterre J, Buzdar A, Nabholz JM, Robertson JF, Thurlimann B, von Euler M,  
171 *et al.* Anastrozole is superior to tamoxifen as first-line therapy in hormone  
172 receptor positive advanced breast carcinoma. *Cancer* **2001**;92:2247-58
- 173 49. Tryfonidis K, Basaran G, Bogaerts J, Debled M, Dirix L, Thery JC, *et al.* A  
174 European Organisation for Research and Treatment of Cancer randomized,  
175 double-blind, placebo-controlled, multicentre phase II trial of anastrozole in  
176 combination with gefitinib or placebo in hormone receptor-positive advanced  
177 breast cancer (NCT00066378). *Eur J Cancer* **2016**;53:144-54
- 178 50. Shepherd FA, Rodrigues Pereira J, Ciuleanu T, Tan EH, Hirsh V, Thongprasert S,  
179 *et al.* Erlotinib in previously treated non-small-cell lung cancer. *N Engl J Med*  
180 **2005**;353:123-32
- 181 51. Ohe Y, Ohashi Y, Kubota K, Tamura T, Nakagawa K, Negoro S, *et al.*  
182 Randomized phase III study of cisplatin plus irinotecan versus carboplatin plus  
183 paclitaxel, cisplatin plus gemcitabine, and cisplatin plus vinorelbine for advanced  
184 non-small-cell lung cancer: Four-Arm Cooperative Study in Japan. *Ann Oncol*  
185 **2007**;18:317-23
- 186 52. Miller VA, Hirsh V, Cadranel J, Chen YM, Park K, Kim SW, *et al.* Afatinib  
187 versus placebo for patients with advanced, metastatic non-small-cell lung cancer  
188 after failure of erlotinib, gefitinib, or both, and one or two lines of chemotherapy  
189 (LUX-Lung 1): a phase 2b/3 randomised trial. *Lancet Oncol* **2012**;13:528-38



- 190 53. Chapman PB, Hauschild A, Robert C, Haanen JB, Ascierto P, Larkin J, *et al.*  
191 Improved survival with vemurafenib in melanoma with BRAF V600E mutation.  
192 N Engl J Med **2011**;364:2507-16
- 193 54. Robert C, Schachter J, Long GV, Arance A, Grob JJ, Mortier L, *et al.*  
194 Pembrolizumab versus Ipilimumab in Advanced Melanoma. N Engl J Med  
195 **2015**;372:2521-32
- 196 55. Hauschild A, Grob JJ, Demidov LV, Jouary T, Gutzmer R, Millward M, *et al.*  
197 Dabrafenib in BRAF-mutated metastatic melanoma: a multicentre, open-label,  
198 phase 3 randomised controlled trial. Lancet **2012**;380:358-65
- 199 56. Van Cutsem E, Vervenne WL, Bennouna J, Humblet Y, Gill S, Van Laethem JL,  
200 *et al.* Phase III trial of bevacizumab in combination with gemcitabine and  
201 erlotinib in patients with metastatic pancreatic cancer. J Clin Oncol  
202 **2009**;27:2231-7
- 203 57. Moore MJ, Goldstein D, Hamm J, Figer A, Hecht JR, Gallinger S, *et al.* Erlotinib  
204 plus gemcitabine compared with gemcitabine alone in patients with advanced  
205 pancreatic cancer: a phase III trial of the National Cancer Institute of Canada  
206 Clinical Trials Group. J Clin Oncol **2007**;25:1960-6
- 207 58. Kindler HL, Niedzwiecki D, Hollis D, Sutherland S, Schrag D, Hurwitz H, *et al.*  
208 Gemcitabine plus bevacizumab compared with gemcitabine plus placebo in  
209 patients with advanced pancreatic cancer: phase III trial of the Cancer and  
210 Leukemia Group B (CALGB 80303). J Clin Oncol **2010**;28:3617-22
- 211 59. Small EJ, Schellhammer PF, Higano CS, Redfern CH, Nemunaitis JJ, Valone FH,  
212 *et al.* Placebo-controlled phase III trial of immunologic therapy with sipuleucel-T  
213 (APC8015) in patients with metastatic, asymptomatic hormone refractory prostate  
214 cancer. J Clin Oncol **2006**;24:3089-94
- 215 60. Kantoff PW, Schuetz TJ, Blumenstein BA, Glode LM, Bilhartz DL, Wyand M, *et*  
216 *al.* Overall survival analysis of a phase II randomized controlled trial of a  
217 Poxviral-based PSA-targeted immunotherapy in metastatic castration-resistant  
218 prostate cancer. J Clin Oncol **2010**;28:1099-105

- 219 61. Beer TM, Armstrong AJ, Rathkopf DE, Loriot Y, Sternberg CN, Higano CS, *et*  
220 *al.* Enzalutamide in metastatic prostate cancer before chemotherapy. *N Engl J*  
221 *Med* **2014**;371:424-33
- 222 62. Yang JC, Haworth L, Sherry RM, Hwu P, Schwartzentruber DJ, Topalian SL, *et*  
223 *al.* A randomized trial of bevacizumab, an anti-vascular endothelial growth factor  
224 antibody, for metastatic renal cancer. *N Engl J Med* **2003**;349:427-34
- 225 63. Motzer RJ, Escudier B, Oudard S, Hutson TE, Porta C, Bracarda S, *et al.* Phase 3  
226 trial of everolimus for metastatic renal cell carcinoma : final results and analysis  
227 of prognostic factors. *Cancer* **2010**;116:4256-65
- 228 64. Rini BI, Wilding G, Hudes G, Stadler WM, Kim S, Tarazi J, *et al.* Phase II study  
229 of axitinib in sorafenib-refractory metastatic renal cell carcinoma. *J Clin Oncol*  
230 **2009**;27:4462-8
- 231 65. Guan X, Ma F, Fan Y, Zhu W, Hong R, Xu B. Platinum-based chemotherapy in  
232 triple-negative breast cancer: a systematic review and meta-analysis of  
233 randomized-controlled trials. *Anticancer Drugs* **2015**;26:894-901
- 234 66. Dieras V, Campone M, Yardley DA, Romieu G, Valero V, Isakoff SJ, *et al.*  
235 Randomized, phase II, placebo-controlled trial of onartuzumab and/or  
236 bevacizumab in combination with weekly paclitaxel in patients with metastatic  
237 triple-negative breast cancer. *Ann Oncol* **2015**;26:1904-10
- 238 67. Carey LA, Rugo HS, Marcom PK, Mayer EL, Esteva FJ, Ma CX, *et al.* TBCRC  
239 001: randomized phase II study of cetuximab in combination with carboplatin in  
240 stage IV triple-negative breast cancer. *J Clin Oncol* **2012**;30:2615-23  
241  
242

243 **Figure S1.** Distribution fitting and simulation workflow for pancreatic cancer. Panel A:  
244 Cullen and Frey plot with bootstrapped values. Panel B: Statistical fitting of calculated  
245 growth rates using the following distribution models: normal, uniform, lognormal, gamma,  
246 and weibull. For each distribution, the empirical and theoretical distribution (upper left),  
247 quantile-quantile (QQ: upper right), probability-probability (PP: lower right) and  
248 theoretical and empirical cumulative distribution function (CDF: lower left) plots are  
249 shown.

250 A.

251

### Cullen and Frey graph

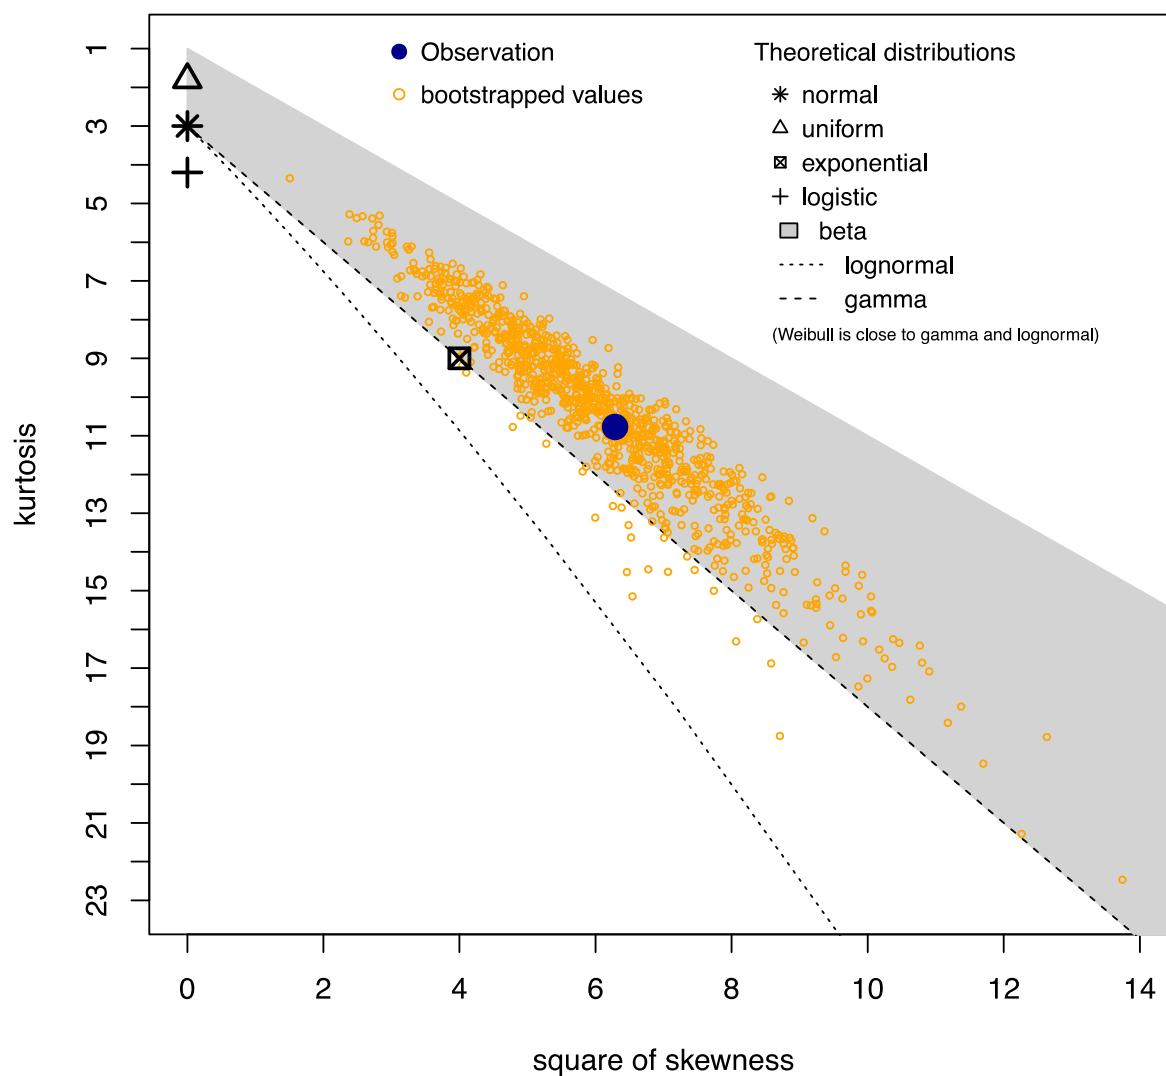

252  
253  
254

### B. Normal Distribution

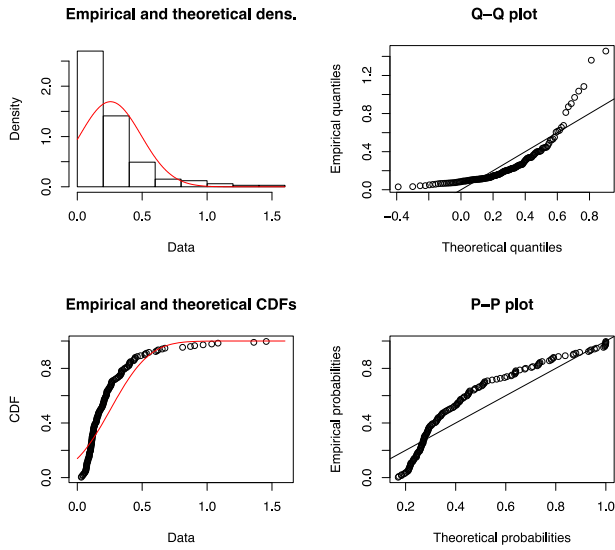

### Uniform Distribution

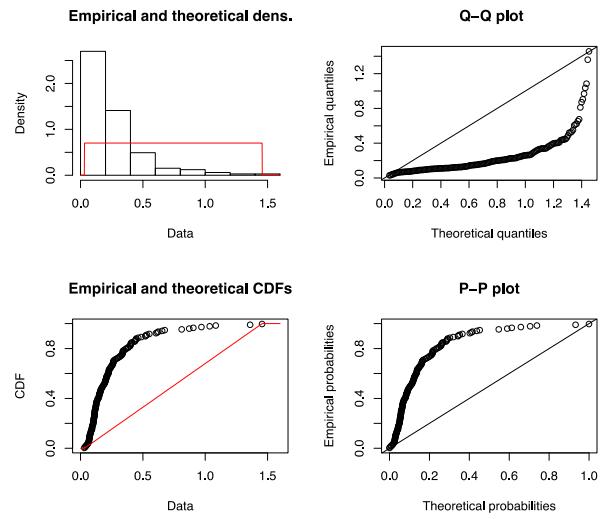

### Log-normal Distribution

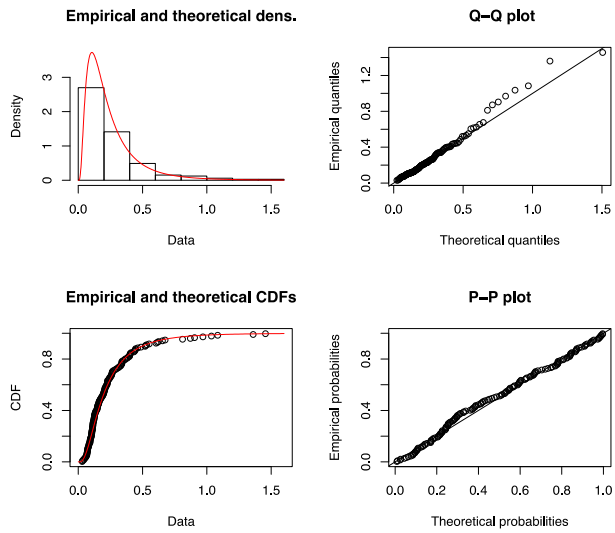

### Gamma Distribution

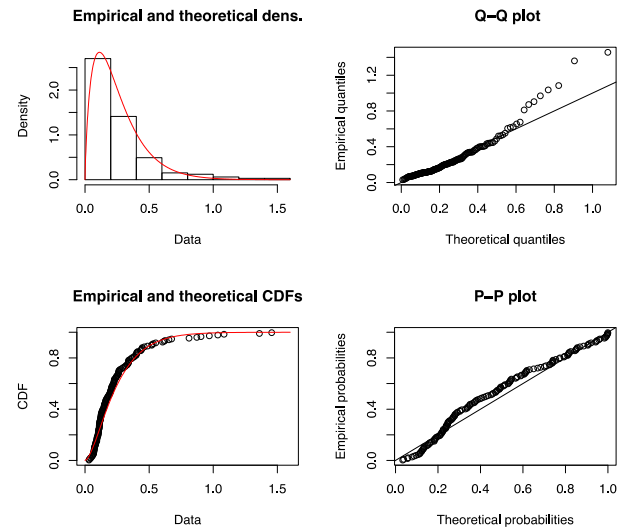

### Weibull Distribution

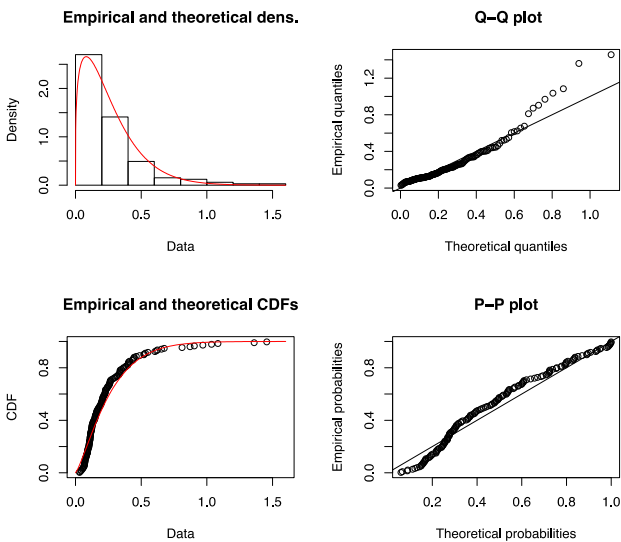

255 **Figure S2.** The progression free survival (PFS) curves for melanoma.(3) (A) Kaplan-Meier  
256 plot generated using the numbers at risk provided by *Kim et al.*(3) (B) Kaplan Meier plot  
257 generated using the growth rate values extracted using the first approach.

258  
259  
260  
261  
262

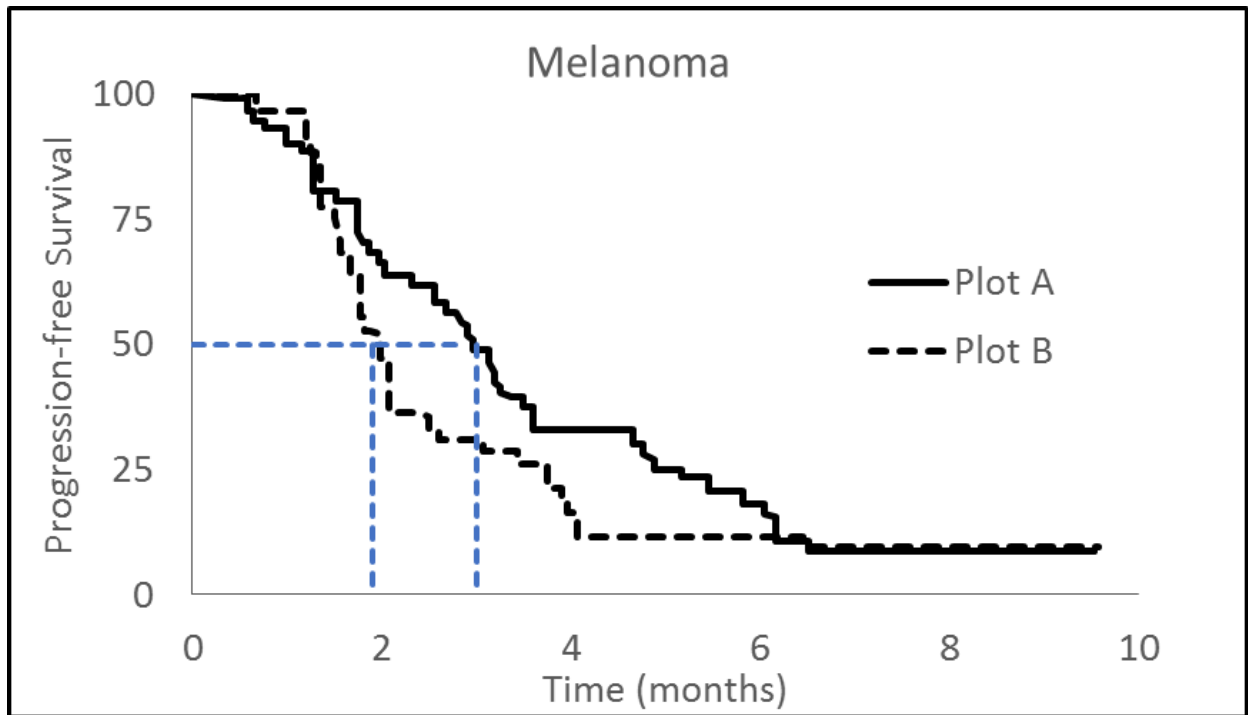

263 **Figure S3.** Visual representation of how random uniform distribution affects calculated  
 264 exponential growth rates of renal cell carcinoma. Panel a shows the published  
 265 progression free survival (PFS) plot from which growth rates in Panels b and c were  
 266 calculated.(11) The histograms in panels b and c represent the growth rates derived  
 267 without and with the application of random uniform distribution to the event times.

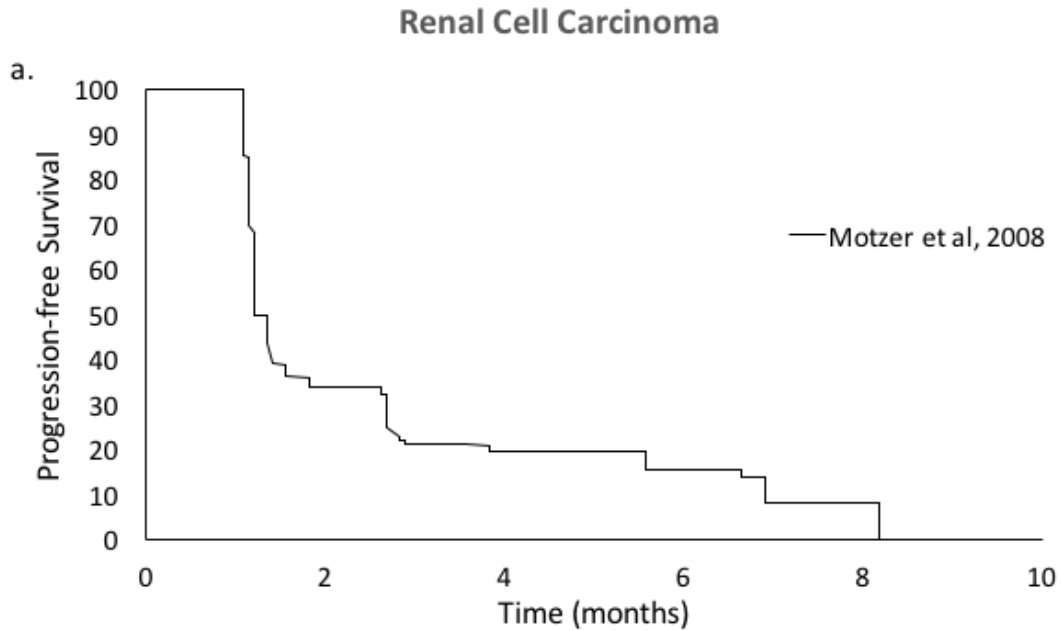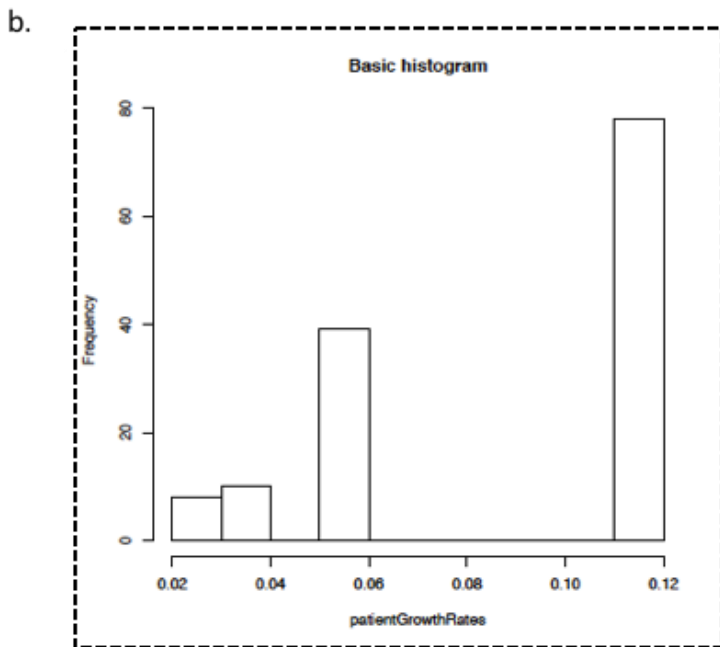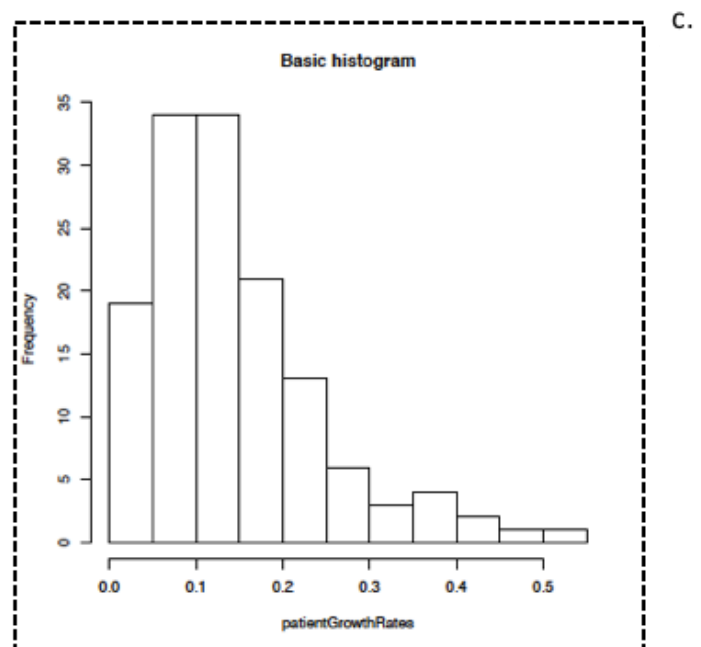

269 **Supplementary Equations 1: Deriving Kaplan Meier estimate for number of events**

270 Defining Kaplan Meier (KM) estimate for the survival function

271

272 
$$S(t) = \prod_{i=1}^k \left(1 - \frac{d_i}{n_i}\right) \quad \text{Equation S1}$$

273 Survival estimate for the first time point of observation,  $S(t)_1$

274

275 
$$S(t)_1 = 1 - \frac{d_1}{n_1} \quad \text{Equation S2}$$

276

277 Solving for number of deaths at 1<sup>st</sup> time point of observation

278

279 
$$d_1 = (1 - S(t)_1) \cdot n_1 \quad \text{Equation S3}$$

280

281 Survival estimate at 2<sup>nd</sup> time point of observation

282

283 
$$S(t)_2 = \left(1 - \frac{d_1}{n_1}\right) \cdot \left(1 - \frac{d_2}{n_2}\right) \quad \text{Equation S4}$$

284

285 Solving for number of deaths at 2<sup>nd</sup> time point of observation

286 
$$d_2 = n_2 \left(1 - \frac{S(t)_2}{1 - \frac{d_1}{n_1}}\right) \quad \text{Equation S5}$$

287

288 Using Equation S2 we know

289 
$$d_2 = n_2 \cdot \left(1 - \frac{S(t)_2}{S(t)_1}\right) \quad \text{Equation S6}$$

290

291 Generalizing the function for number of deaths

292

293 
$$d_i = n_{i-1} \cdot \left(1 - \frac{S(t)_i}{S(t)_{i-1}}\right) \quad \text{Equation S7}$$

294 where  $n_0$  is the sample size and  $S(t)_0 = 1$ .

295 **Supplementary Equations 2: Determining the growth rate of a tumor progression**  
296 **“event”**

297

298 An event is defined as a 20 or 25% growth in sum of longest diameter (SLD) by RECIST  
299 and WHO respectively.

300

301 Here, the tumor is assumed to be spherical, and the standard equation is used to describe  
302 the volume of a sphere

303

304 
$$\text{Sphere volume} = \frac{4}{3} \cdot \pi \cdot r^3$$

305

Equation S8

306 Where r is the radius of the circle or diameter/2, D.

307

308 Assuming the initial tumor diameter  $D_0=1\text{cm}$ , the 20% increased diameter  $D_{20\%}=1.2\text{cm}$   
309 indicates a progression event and the corresponding spherical volumes are

310

311 
$$V_0 = \frac{4}{3} \cdot \pi \cdot \left(\frac{1}{2}\right)^3 = 0.5236\text{cm}^3$$

312

Equation S9

313

314 
$$V_{20\%} = \frac{4}{3} \cdot \pi \cdot \left(\frac{1.2}{2}\right)^3 = 0.9048\text{cm}^3$$

315

Equation S10

316

317

318 Equation 2 of the main manuscript is

319

320 
$$TV = TV_0 \cdot e^{k_g \cdot t}$$

321

322 Rearranging this equation to find the time of the event ( $t_{\text{event}}$ ) and using the solution to  
323 Equations S9 and S10 allows us to find the growth rate



324

325

$$0.9048 = 0.5236 \cdot e^{k_g \cdot t_{event}}$$

326

327

$$k_g = \frac{\ln(1.728)}{t_{event}}$$

328

Equation S11

329

330 If a tumor progression event were defined by a 25% increase in diameter,  $D_{25\%}=1.25\text{cm}$

331

332

$$V_{25\%} = \frac{4}{3} \cdot \pi \cdot \left(\frac{1.25}{2}\right)^3 = 1.023\text{cm}^3$$

333

Equation S12

334

335 Rearranging Equation 2 of the main manuscript to find the growth rate

336

337

$$1.023 = 0.5236 \cdot e^{k_g \cdot t_{event}}$$

338

339

$$k_g = \frac{\ln(1.954)}{t_{event}}$$

340

Equation S13

341

342 Equation S11 is equivalent to Equation 3 of the main text when an event is defined using

343 the RECIST criteria of 20% increase in SLD and Equation S13 is equivalent to Equation 3

344 of the main text when an event is defined using the WHO criteria of 25% increase in SLD.

345

346 **Supplementary Equations 3: Assuming tumors are oblong rather than spherical**

347

348 This manuscript assumes that tumors are spherical and grow accordingly. If we instead  
349 assumed tumors were oblong shaped with equal short axes measurements, we find the  
350 eventual values of growth rates of a progression “event” are equal to those derived under  
351 the spherical assumption. In this supplementary document we show how that happens when  
352 an event is defined as 20% increase in the diameter (results are the same when the WHO  
353 25% increase criteria is used).

354

355 The oblong volume can be determined using

356

357 
$$\text{Oblong volume} = \frac{4}{3} \cdot \pi \cdot w^2 \cdot L$$

358

Equation S14

359

360 where  $w$  is the radius of the two short axes and  $L$  is the radius of the longest length. We  
361 have no information to inform the relationship between  $L$  and  $w$ , so we first assume  
362  $w=0.5 \cdot L$  and then  $w=0.66 \cdot L$

363

364 If the longest diameter of the initial tumor is  $D_0=1\text{cm}$ , the 20% increased diameter  
365  $D_{20\%}=1.2\text{cm}$  indicates a progression event and  $w=0.5 \cdot L$ . The corresponding oblong  
366 volumes are

367

368 
$$V_0 = \frac{4}{3} \cdot \pi \cdot \left(0.5 \cdot \frac{1}{2}\right)^2 * \frac{1}{2} = 0.131\text{cm}^3$$

369

Equation S15

370

371 
$$V_{20\%} = \frac{4}{3} \cdot \pi \cdot \left(0.5 \cdot \frac{1.2}{2}\right)^2 * \frac{1.2}{2} = 0.226\text{cm}^3$$

372

Equation S16

373

374 Rearranging Equation 2 of the main manuscript to find the growth rate

375

376

$$0.226 = 0.131 \cdot e^{k_g \cdot t_{event}}$$

377

378

$$k_g = \frac{\ln(1.728)}{t_{event}}$$

379

Equation S17

380

381 Note, this is the same equation we derived when assuming tumors are spherical (Equation

382 S11). If we instead assume the oblong width is two thirds the longest length

383

$$V_0 = \frac{4}{3} \cdot \pi \cdot \left(0.66 \cdot \frac{1}{2}\right)^2 * \frac{1}{2} = 0.228cm^3$$

384

Equation S18

385

386

$$V_{20\%} = \frac{4}{3} \cdot \pi \cdot \left(0.66 \cdot \frac{1.2}{2}\right)^2 * \frac{1.2}{2} = 0.394cm^3$$

387

Equation S19

388

389 Rearranging Equation 2 of the main manuscript to find the growth rate

390

391

$$0.394 = 0.228 \cdot e^{k_g \cdot t_{event}}$$

392

393

$$k_g = \frac{\ln(1.728)}{t_{event}}$$

394

Equation S20

395

396 Again, this is the same equation we derived when assuming tumors are spherical

397 (Equation S11).

398
